# Supplementary material for: Brain activity patterns in high-throughput electrophysiology screen predict both drug efficacies and side effects
Source: PubMed Central journal article supplement (PMC5768723; doi:10.1038/s41467-017-02404-4), 2018-01-15
Supplement: 41467_2017_2404_MOESM2_ESM.pdf [file 41467_2017_2404_MOESM2_ESM.pdf]

File Name: **Supplementary Data 1**

Description: **Compound Library**

File Name: **Supplementary Movie 1**

Description: **Light stimuli trigger seizure-like activity in *scn1lab* mutant larvae.** Video showing light-triggered locomotor activity in *scn1lab*<sup>s552</sup> homozygous mutants (left half of the plate) and age-matched sibling controls (right half of the plate). Recordings were performed in darkness using IR-illumination. The two dark wells in the bottom row contain a fluorescent dye that is sensitive to illumination in the visible spectrum and indicate the timing of the light stimuli.
